# Supplementary material for: Interferon-Gamma Impairs Maintenance and Alters Hematopoietic Support of Bone Marrow Mesenchymal Stromal Cells
Source: PubMed Central journal article supplement — Stem Cells Dev. 2018 May 1;27(9):579–89. doi: 10.1089/scd.2017.0196 (PMC5934977; doi:10.1089/scd.2017.0196), 2018-05-01
Supplement: Supp_Fig1.pdf [file Supp_Fig1.pdf]

## Supplementary Data

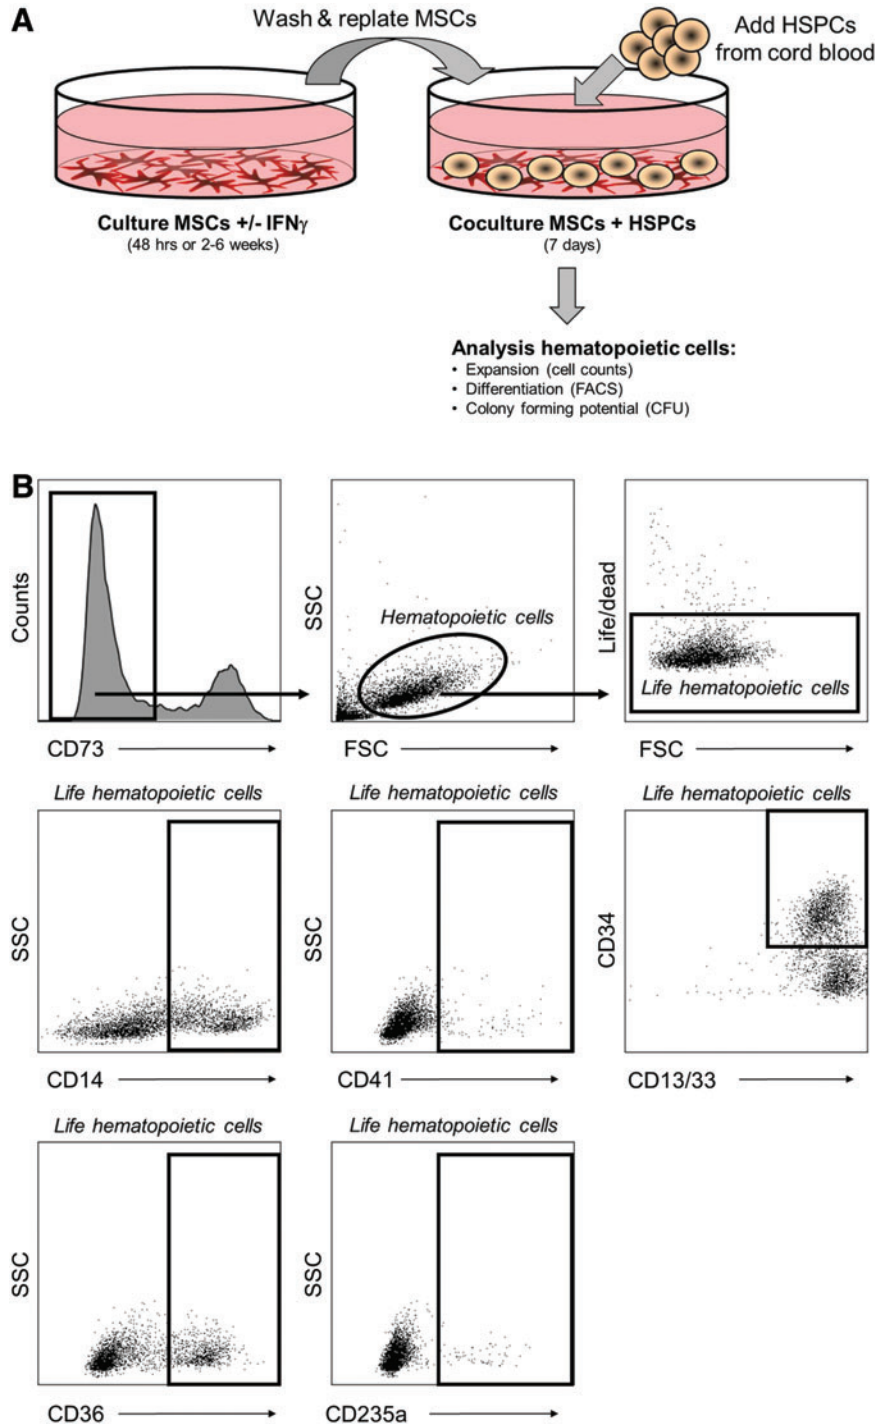

**SUPPLEMENTARY FIG. S1.** Experimental setup and gating strategy of HSPC after the coculture. **(A)** Graphical explanation of the experimental setup used for the MSC-HSPC coculture. **(B)** Flow cytometric gating strategy of the coculture experiments between MSCs and HSPCs, 7 days after initiation of these cultures. To exclude MSCs from the analysis, we gated on CD73-negative cells, as this is only expressed on MSCs and not on hematopoietic cells. Next, hematopoietic cells were gated based on FSC and SSC, followed by a viability gate using a live–dead marker. Viable, hematopoietic cells were further analyzed for the expression of CD14, CD41, CD34, CD13/33, CD36, and CD235a expression. MSC, mesenchymal stromal cell; HSPC, hematopoietic stem and progenitor cells; FSC, forward scatter; SSC, sideward scatter.
