# Supplementary material for: Interferon-Gamma Impairs Maintenance and Alters Hematopoietic Support of Bone Marrow Mesenchymal Stromal Cells
Source: PubMed Central journal article supplement — Stem Cells Dev. 2018 May 1;27(9):579–89. doi: 10.1089/scd.2017.0196 (PMC5934977; doi:10.1089/scd.2017.0196), 2018-05-01
Supplement: Supp_Fig2.pdf [file Supp_Fig2.pdf]

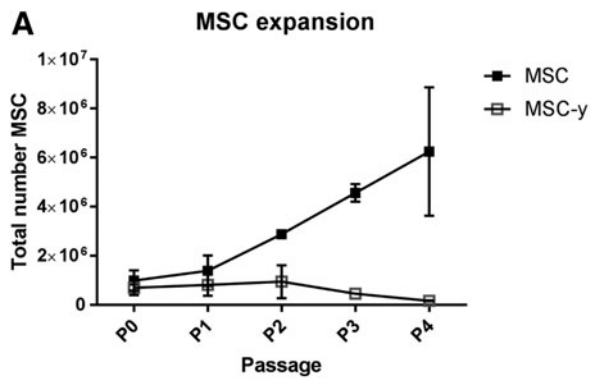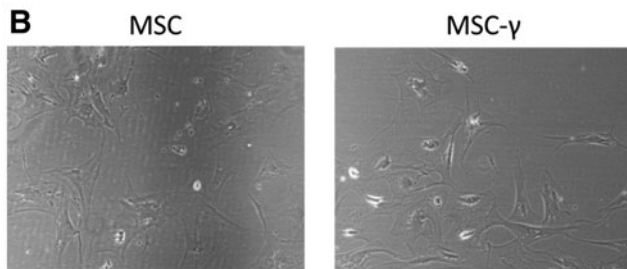

Co-culture of MSC and HSPC

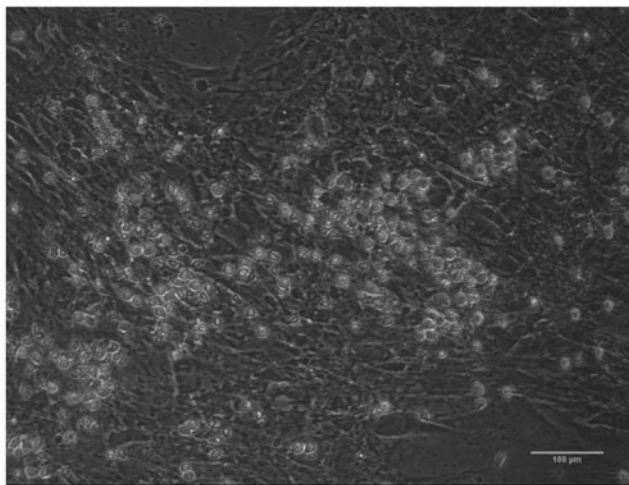

**SUPPLEMENTARY FIG. S2.** MSC characteristics. **(A)** Expansion of MSCs cultured in M199 media supplemented with 10% FCS, 1% penicillin–streptomycin, 20 μg/mL ECGF, and 8 IU/mL Heparin in the absence (MSC) or presence (MSC-γ) of IFN-γ (mean–SD;  $n=4$ ). **(B)** Representative images of MSC and MSC-γ during culture expansion and a representative image of a coculture experiment with MSC and HSPC. ECGF, endothelial cell growth factor.
