# Supplementary material for: Interferon-Gamma Impairs Maintenance and Alters Hematopoietic Support of Bone Marrow Mesenchymal Stromal Cells
Source: PubMed Central journal article supplement — Stem Cells Dev. 2018 May 1;27(9):579–89. doi: 10.1089/scd.2017.0196 (PMC5934977; doi:10.1089/scd.2017.0196), 2018-05-01
Supplement: Supp_Fig3.pdf [file Supp_Fig3.pdf]

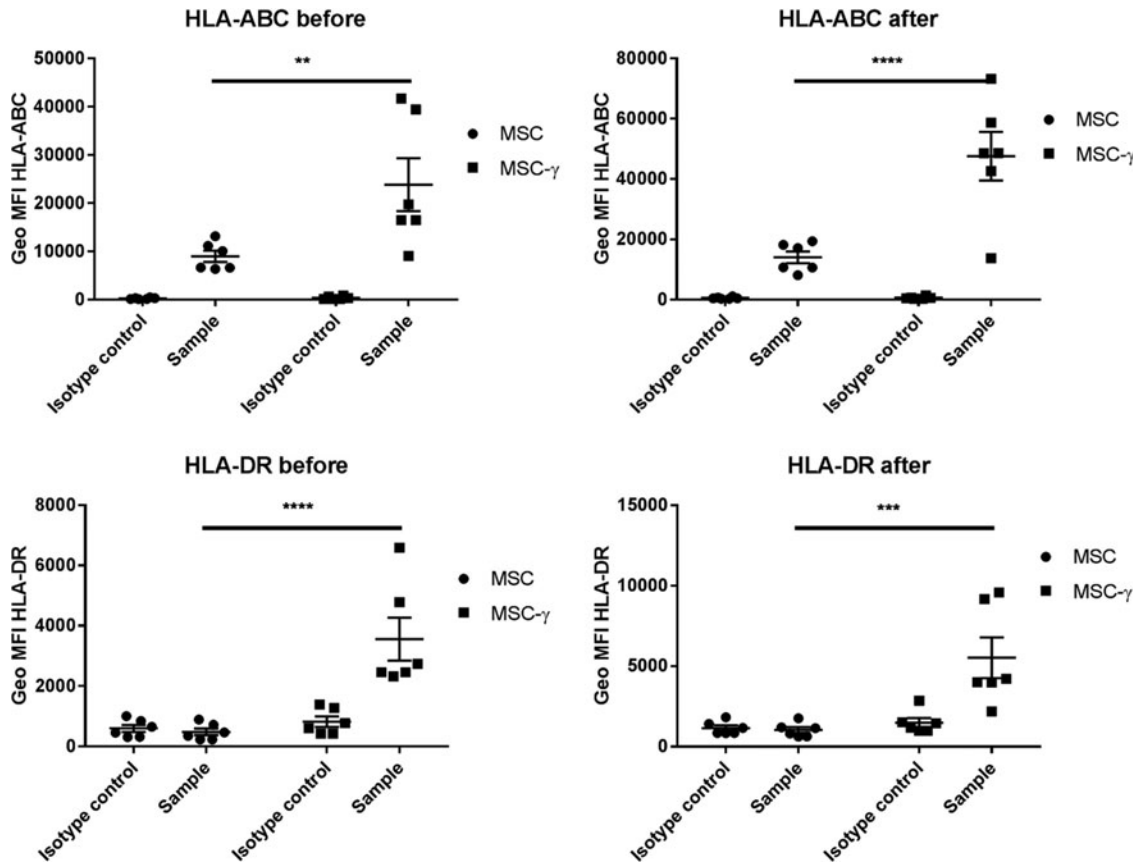

**SUPPLEMENTARY FIG. S3.** Phenotypical analysis of MSCs before and after the coculture (after 7 days). MSCs were first identified by CD34 and CD45 negativity. Double negative cells were triple positive for CD73, CD90, and CD105. Upregulation of HLA-ABC and HLA-DR was observed in MSC- $\gamma$ , which is a hallmark of IFN- $\gamma$  stimulation. HLA-ABC and HLA-DR were still upregulated at the end of the coculture of 7 days. \*\* $P < 0.01$ , \*\*\* $P < 0.001$ , \*\*\*\* $P < 0.0001$ , unpaired  $t$ -test. HLA-ABC, human leukocyte antigen ABC; HLA-DR, human leukocyte antigen DR.
