# Supplementary material for: Interferon-Gamma Impairs Maintenance and Alters Hematopoietic Support of Bone Marrow Mesenchymal Stromal Cells
Source: PubMed Central journal article supplement — Stem Cells Dev. 2018 May 1;27(9):579–89. doi: 10.1089/scd.2017.0196 (PMC5934977; doi:10.1089/scd.2017.0196), 2018-05-01
Supplement: Supp_Fig4.pdf [file Supp_Fig4.pdf]

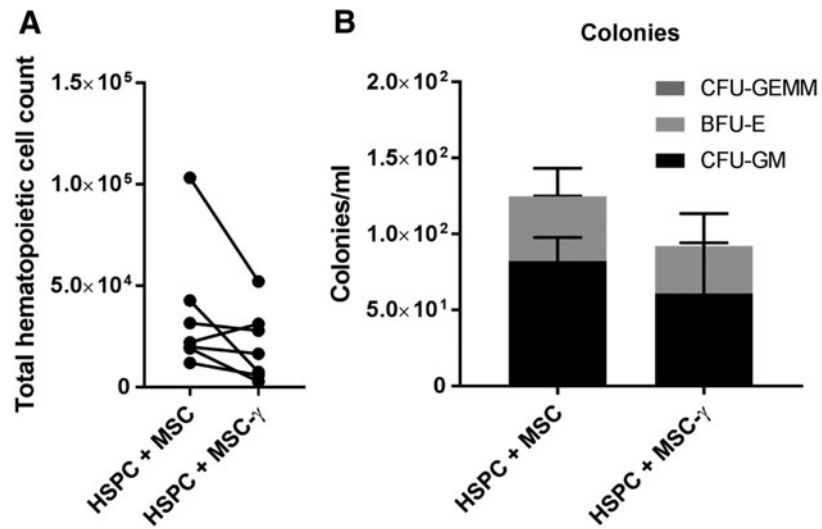

**SUPPLEMENTARY FIG. S4.** Short IFN- $\gamma$  stimulation alters hematopoietic support by MSCs. **(A)** Total hematopoietic cell counts (absolute) after 7 days of coculturing MSC or MSC- $\gamma$  with HSPCs ( $n=7$ ). **(B)** After 7 days of coculturing MSC or MSC- $\gamma$  with HS(P)Cs, a volume of 500  $\mu$ L was seeded in methylcellulose medium. Colony-forming precursors were counted after 14 days of culturing. Bars represent the average total (mean-SD;  $n=7$ ). In all experiments MSC- $\gamma$  were cultured in medium containing 10 ng/mL recombinant human IFN- $\gamma$  for 40–48 h. For all experiments, MSCs between passage 4–5 were used. For each  $n$ -number, a unique MSC donor and a unique cord blood donor were used. CFU, colony-forming unit; GM, granulocyte–monocyte; GEMM, granulocyte–erythrocyte–monocyte–megakaryocyte; BFU-E, burst-forming unit-erythroid.
