# Supplementary material for: Interferon-Gamma Impairs Maintenance and Alters Hematopoietic Support of Bone Marrow Mesenchymal Stromal Cells
Source: PubMed Central journal article supplement — Stem Cells Dev. 2018 May 1;27(9):579–89. doi: 10.1089/scd.2017.0196 (PMC5934977; doi:10.1089/scd.2017.0196), 2018-05-01
Supplement: Supp_Fig5.pdf [file Supp_Fig5.pdf]

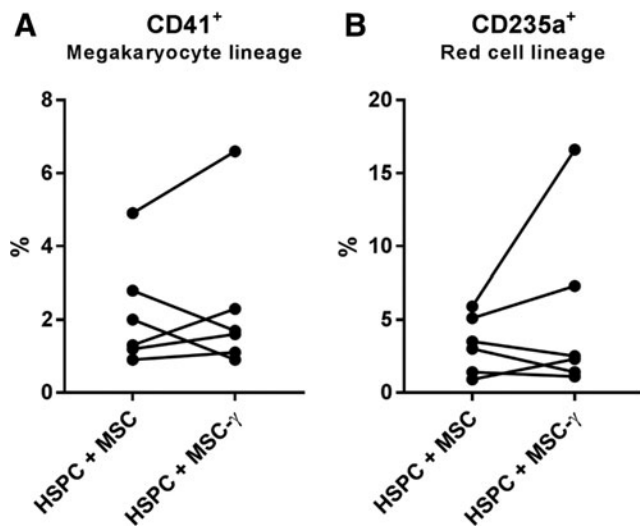

**SUPPLEMENTARY FIG. S5.** Flow cytometric analysis of HSPC after 7 days of coculturing with MSC or MSC- $\gamma$ . Presence of CD41<sup>+</sup> (megakaryocyte lineage) (A) and CD235a<sup>+</sup> (red cell lineage) (B) hematopoietic cells was determined ( $n=6$ ).
