# Supplementary material for: Interferon-Gamma Impairs Maintenance and Alters Hematopoietic Support of Bone Marrow Mesenchymal Stromal Cells
Source: PubMed Central journal article supplement — Stem Cells Dev. 2018 May 1;27(9):579–89. doi: 10.1089/scd.2017.0196 (PMC5934977; doi:10.1089/scd.2017.0196), 2018-05-01
Supplement: Supp_Fig6.pdf [file Supp_Fig6.pdf]

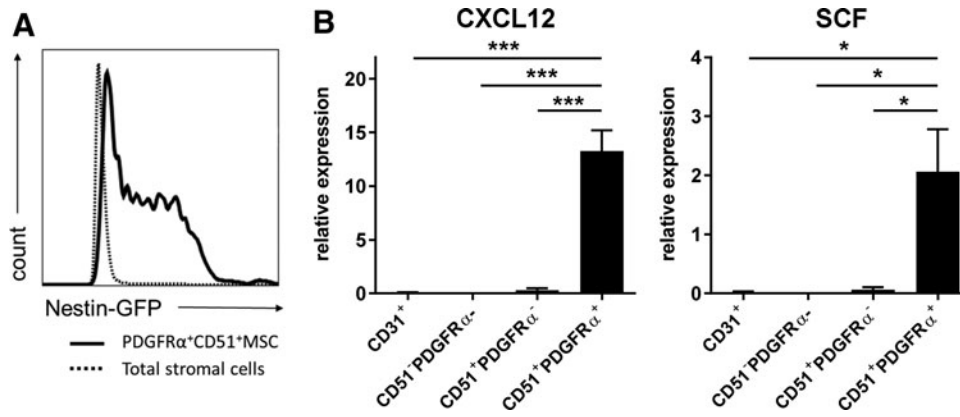

**SUPPLEMENTARY FIG. S6.** Confirmation of PDGFR $\alpha$ <sup>+</sup>CD51<sup>+</sup> MSC. (A) Flow cytometric analysis of Nestin-GFP expression by CD45<sup>-</sup>Ter119<sup>-</sup>CD31<sup>-</sup>PDGFR $\alpha$ <sup>+</sup>CD51<sup>+</sup> MSC as compared with total CD45<sup>-</sup>Ter119<sup>-</sup>CD31<sup>-</sup> stromal cells (B) RT-qPCR analysis of CXCL12 and stem cell factor expression by sorted CD45<sup>-</sup>Ter119<sup>-</sup>CD31<sup>-</sup>PDGFR $\alpha$ <sup>+</sup>CD51<sup>+</sup> MSC as compared with CD45<sup>-</sup>Ter119<sup>-</sup>CD31<sup>+</sup> endothelial cells and PDGFR $\alpha$  or CD51 single positive stromal cells (mean $\pm$ SEM;  $n=5$ ). \* $P<0.05$ ; \*\*\* $P<0.001$  unpaired  $t$ -test. RT-qPCR, quantitative real-time polymerase chain reaction; SEM, standard error of the mean.
