# Supplementary material for: Interferon-Gamma Impairs Maintenance and Alters Hematopoietic Support of Bone Marrow Mesenchymal Stromal Cells
Source: PubMed Central journal article supplement — Stem Cells Dev. 2018 May 1;27(9):579–89. doi: 10.1089/scd.2017.0196 (PMC5934977; doi:10.1089/scd.2017.0196), 2018-05-01
Supplement: Supp_Fig7.pdf [file Supp_Fig7.pdf]

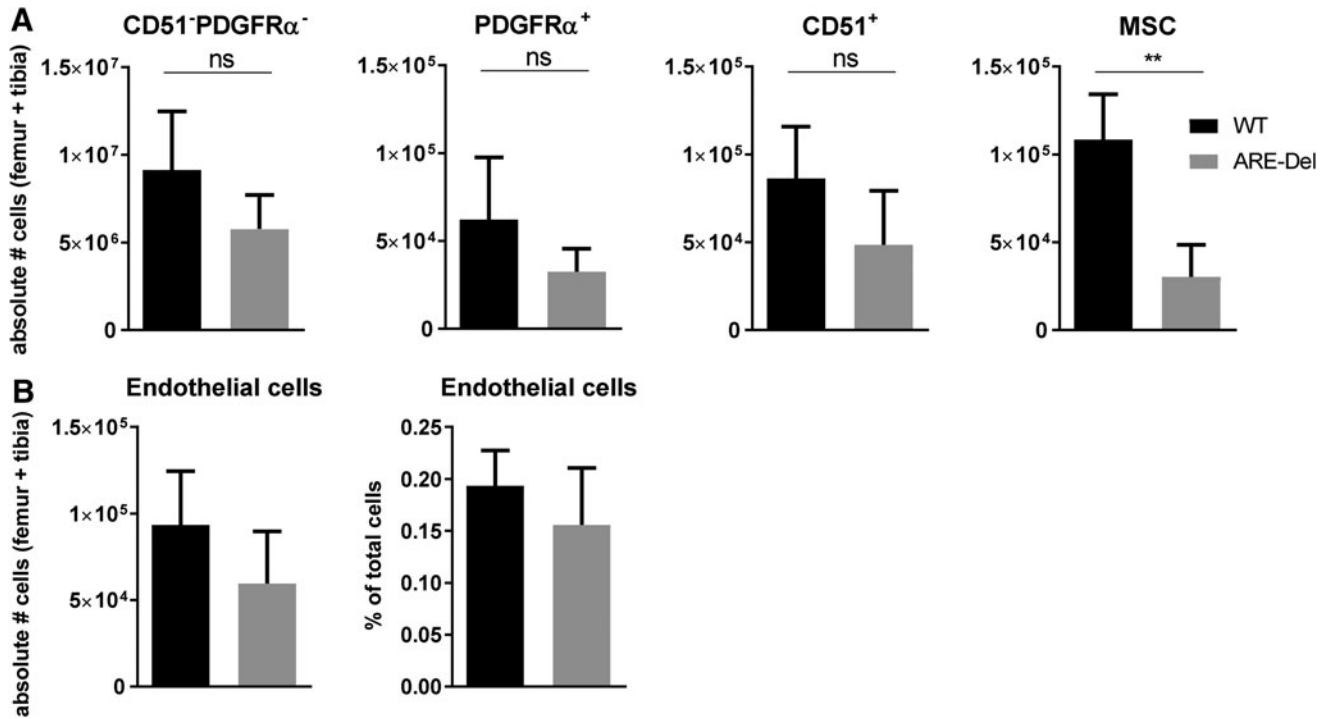

**SUPPLEMENTARY FIG. S7.** Presence of stromal cell subsets and endothelial cells. **(A)** Absolute numbers of bone marrow stromal cell subsets in ARE-Del mice and WT controls (mean-SEM;  $n=5$ ). **(B)** Absolute and relative numbers of CD31<sup>+</sup> endothelial cells in ARE-Del mice and WT controls (mean-SEM;  $n=5$ ). WT, wild type.
